# Supplementary material for: Inland navigation is a driver of freshwater biodiversity declines in Europe
Source: Research Square preprint supplement (doi:10.21203/rs.3.rs-3316255/v1), 2023-09-14
Supplement: Supplementary file 1 [file 006094b4c6af944a457419d0.xlsx]

## Sheet: Tab1
Fish									Macroinvertebrates
Trait_class	Trait_subset	CS1	CS2						Trait_class	Trait_subset	CS1	CS2
Feeding	Detritivorous	0.418585	-0.572942						Saprobity	Xenosaprobic	0.0823661	0.0588427
Feeding	Invertivorous	0.408785	-0.277715						Saprobity	Oligosaprobic	0.0953898	-0.0472648
Feeding	Omnivorous	-0.0228517	0.249534						Saprobity	Beta Mesosaprobic	-0.179604	0.301865
Feeding	Parasitic	-0.445497	0.873749						Saprobity	Alpha Mesosaprobic	-0.0412187	0.0255396
Feeding	Phytovorous	0.493451	-0.245773						Saprobity	Polysaprobic	-0.112652	-0.135018
Feeding	Piscivorous	-0.527801	0.284584						Substrate	Flags Boulders Cobbles Pebbles	-0.184611	-0.333422
Feeding	Planktivorous	-1.8949	-2.87237						Substrate	Gravel	-0.211203	0.243519
Habitat	Benthic	0.123047	0.17931						Substrate	Sand	-0.124856	0.188222
Habitat	Demersal	-0.0111894	-0.242365						Substrate	Silt	0.0117192	0.212724
Habitat	Pelagic	-2.00495	-1.60093						Substrate	Macrophytes	-0.0637642	-0.0301785
Migration	Diadromous	-0.927878	-0.717345						Substrate	Microphytes	-0.26974	0.0685843
Migration	Non.migratory	0.408888	-0.396387						Substrate	Twigs Roots	-0.18578	-0.191739
Migration	Potamodromous	0.0674497	0.166602						Substrate	Organic Detritus Litter	0.088441	-0.11653
Reproduction	Lithopelagophil	0.70628	0.145673						Substrate	Mud	0.181015	0.208176
Reproduction	Lithophil	0.131323	-0.810975						Dispersal	Aquatic Passive	-0.301539	-0.0795333
Reproduction	Ostracophil	0.657453	-0.131742						Dispersal	Aquatic Active	0.134062	-0.214529
Reproduction	Pelagophil	-0.729555	0.648617						Dispersal	Aerial Passive	5.88351e-05	-0.238781
Reproduction	Phytolithophil	-0.221538	0.418474						Dispersal	Aerial Active	0.298448	0.208016
Reproduction	Phytophil	0.209006	-0.118692						Locomotion	Flier	0.337281	0.0552959
Reproduction	Polyphil	0.585717	-0.206155						Locomotion	Surface Swimmer	0.00664076	-0.29515
Reproduction	Psammophil	-1.66361	-3.03048						Locomotion	Full Water Swimmer	0.291748	-0.0267899
Reproduction	Speleophil	0.0685553	-0.643055						Locomotion	Crawler	-0.0780836	0.0336891
Rheophily	Eurytop	-0.292185	0.180386						Locomotion	Burrower	0.0667276	0.179287
Rheophily	Limnophil	0.588133	-0.269054						Locomotion	Interstitial	-0.29522	0.0496179
Rheophily	Rheophil	0.500959	-0.332824						Locomotion	Temporarily Attached	-0.126885	-0.0411617
Region	Sensitivity	-0.262955	0.18885						Locomotion	Permanently Attached	0.0257217	-0.0174707
Region	FRI	-0.430372	0.24383						Reproduction	Ovoviviparity	-0.290119	0.0571376
Region	S2FRI	0.0704964	-0.0111341						Reproduction	Eggs Free	-0.0058493	0.287376
									Reproduction	Eggs Cemented	0.0422184	-0.0501917
									Reproduction	Clutches Fixed	0.255269	-0.142236
									Reproduction	Clutches Free	0.0393537	-0.284188
									Reproduction	Clutches Vegetation	0.140707	0.1363
									Reproduction	Clutches Terrestrial	0.0640187	-0.210879
									Reproduction	Asexual	-0.056374	-0.013357
	Predictor	RS1	RS2							Predictor
	Ships	-0.670307	0.725125							Ships	0.720018	-0.620719
	Channelization	-0.195777	-0.212115							Channelization	0.14346	0.265943
	Ports	-0.683787	-0.654947							Ports	0.662996	0.496043
	Locks	0.211648	-0.0156669							Locks	0.146388	0.545825
Fourth-corner Statistics									Fourth-corner Statistics
Permutation method Comb. 2 and 4 ( 999 permutations)									Permutation method Comb. 2 and 4 ( 999 permutations)
Adjustment method for multiple comparisons: fdr									Adjustment method for multiple comparisons: fdr
call: fourthcorner.rlq(xtest = rlq.sword, modeltype = 6, typetest = "axes", p.adjust.method.G = "fdr", p.adjust.method.D = "fdr")									call: fourthcorner.rlq(xtest = rlq.mim, modeltype = 6, typetest = "axes", p.adjust.method.G = "fdr", p.adjust.method.D = "fdr")
	Test	Stat	Obs	Std.Obs	Alter	Pvalue	Pvalue.adj			Test	Stat	Obs	Std.Obs	Alter	Pvalue	Pvalue.adj
AxcR1	AxcQ1	r	0.404429	14.7037	two-sided	0.001	0.002		AxcR1	AxcQ1	r	0.323226	7.10933	two-sided	0.001	0.002
AxcR2	AxcQ1	r	-2.0661e-16	-0.0446416	two-sided	0.96	0.984		AxcR2	AxcQ1	r	1.11208e-15	0.0108911	two-sided	0.991	0.992
AxcR1	AxcQ2	r	7.55845e-16	0.0193246	two-sided	0.984	0.984		AxcR1	AxcQ2	r	3.44744e-16	0.00939977	two-sided	0.992	0.992
AxcR2	AxcQ2	r	0.255313	10.2777	two-sided	0.001	0.002		AxcR2	AxcQ2	r	0.210819	5.69595	two-sided	0.001	0.002
