# Supplementary material for: Inland navigation is a driver of freshwater biodiversity declines in Europe
Source: Research Square preprint supplement (doi:10.21203/rs.3.rs-3316255/v1), 2023-09-14
Supplement: Supplementary file 2 [file 56a63315786050d3128fe28b.xlsx]

## Sheet: Model Estimates
	Fish							Macroinvertebrates
Model Term	Taxonomic Richness	Functional Richness	Taxonomic Diversity	Funtional Diversity	Taxonomic Evenness	Functional Evenness	Invasive Abundance	Taxonomic Richness	Functional Richness	Taxonomic Diversity	Funtional Diversity	Taxonomic Evenness	Functional Evenness	Invasive Abundance
Ships	-0.125*** (0.007)	-0.036*** (0.003)	-0.180*** (0.027)	0.003 (0.003)	0.025*** (0.004)	-0.003 (0.003)	0.048* (0.021)	-0.238*** (0.009)	-0.037*** (0.005)	-0.396*** (0.084)	-0.0003 (0.007)	0.027*** (0.005)	-0.009 (0.007)	0.097* (0.048)
Ports	0.010* (0.004)	0.005*** (0.002)	0.060*** (0.017)	-0.002 (0.002)	-0.002 (0.002)	0.001 (0.002)	0.027 (0.014)	0.025*** (0.005)	0.009*** (0.002)	0.061 (0.049)	0.005 (0.004)	-0.005 (0.003)	-0.004 (0.004)	-0.009 (0.028)
Locks	0.025*** (0.004)	0.003 (0.002)	0.043* (0.018)	0.006*** (0.002)	-0.012*** (0.002)	-0.003 (0.002)	-0.051*** (0.014)	0.002 (0.004)	0.001 (0.002)	-0.059 (0.049)	-0.011** (0.003)	-0.003 (0.003)	-0.007 (0.004)	0.012 (0.030)
Channelization	0.004 (0.004)	0.005** (0.002)	0.019 (0.019)	-0.00000 (0.002)	-0.004 (0.003)	0.007** (0.002)	-0.145*** (0.015)	0.032*** (0.004)	0.006 (0.004)	0.021 (0.054)	0.014* (0.006)	-0.005 (0.003)	-0.002 (0.006)	0.158*** (0.043)
Riparian_Degradation	0.0003 (0.004)	-0.007*** (0.002)	-0.006 (0.017)	0.010*** (0.002)	-0.008*** (0.002)	-0.002 (0.002)	-0.050*** (0.014)	0.002 (0.004)	0.002 (0.003)	-0.031 (0.046)	-0.008 (0.004)	-0.002 (0.003)	0.004 (0.004)	-0.014 (0.027)
Agriculture	-0.011** (0.004)	-0.004* (0.002)	0.047** (0.018)	-0.007*** (0.002)	0.004 (0.002)	0.001 (0.002)	0.060*** (0.014)	-0.004 (0.005)	0.004 (0.003)	-0.044 (0.051)	-0.001 (0.004)	0.004 (0.003)	0.011** (0.004)	0.098** (0.032)
Urban	-0.050*** (0.004)	-0.016*** (0.002)	-0.125*** (0.020)	-0.002 (0.002)	0.004 (0.003)	-0.003 (0.002)	0.054*** (0.016)	-0.047*** (0.005)	-0.010*** (0.003)	-0.031 (0.057)	-0.009* (0.004)	0.021*** (0.004)	0.010* (0.004)	0.144*** (0.034)
Catchment6_size	0.031*** (0.004)	0.005** (0.002)	0.070*** (0.017)	-0.002 (0.001)	0.005* (0.002)	0.004* (0.002)	-0.042** (0.014)	0.015*** (0.004)	0.0003 (0.002)	0.079 (0.047)	-0.018*** (0.003)	0.005 (0.003)	0.003 (0.003)	-0.028 (0.027)
Strahler6	0.117*** (0.010)	0.045*** (0.004)	0.139** (0.052)	0.024*** (0.004)	-0.031*** (0.007)	-0.017** (0.005)	0.537*** (0.041)	-0.113*** (0.010)	-0.015* (0.006)	-0.436*** (0.130)	0.014 (0.009)	-0.011 (0.008)	-0.006 (0.009)	0.662*** (0.075)
Strahler7	0.001 (0.011)	0.021*** (0.005)	-0.030 (0.053)	0.005 (0.004)	0.017* (0.007)	-0.003 (0.005)	0.502*** (0.042)	-0.311*** (0.013)	-0.079*** (0.008)	-1.590*** (0.160)	-0.015 (0.011)	-0.023* (0.010)	-0.035** (0.011)	1.231*** (0.091)
Strahlercanal	-0.098*** (0.010)	-0.011* (0.004)	-0.148** (0.049)	-0.009* (0.004)	0.046*** (0.007)	0.008 (0.005)	0.287*** (0.039)	-0.025** (0.009)	-0.015* (0.006)	-0.398*** (0.118)	0.019* (0.009)	-0.020** (0.008)	-0.012 (0.009)	-0.262*** (0.075)
poly(yr_scaled, 2)1								10.684*** (1.328)	1.246*** (0.370)	-0.129 (5.198)	-0.523 (0.323)	-3.106*** (0.433)	-0.692* (0.286)	15.018*** (2.560)
poly(yr_scaled, 2)2								-3.732** (1.233)	-0.376 (0.370)	1.031 (5.024)	0.192 (0.319)	1.166** (0.417)	1.371*** (0.281)	-5.136* (2.425)
Ships:Rip_Deg	0.025*** (0.005)	-0.004* (0.002)	0.020 (0.018)	-0.004* (0.002)	-0.012*** (0.002)	-0.006** (0.002)	-0.103*** (0.014)	0.018* (0.007)	-0.003 (0.004)	-0.035 (0.074)	-0.008 (0.006)	-0.012* (0.005)	0.001 (0.006)	0.036 (0.042)
Ships:Agriculture	-0.067*** (0.004)	-0.014*** (0.002)	-0.123*** (0.016)	0.004* (0.001)	0.013*** (0.002)	0.007*** (0.002)	0.015 (0.013)	0.0003 (0.009)	-0.002 (0.004)	-0.167* (0.079)	-0.014* (0.006)	-0.015** (0.005)	0.006 (0.007)	0.053 (0.046)
Ships:Urban	-0.047*** (0.004)	-0.015*** (0.002)	-0.051** (0.017)	-0.001 (0.002)	0.013*** (0.002)	0.005* (0.002)	0.078*** (0.014)	0.067*** (0.005)	0.007** (0.003)	0.065 (0.049)	-0.002 (0.004)	-0.013*** (0.003)	0.005 (0.004)	-0.053 (0.029)
Channelization:Rip_Deg	-0.004 (0.003)	0.002 (0.001)	-0.046** (0.015)	0.001 (0.001)	-0.003 (0.002)	0.002 (0.002)	-0.023 (0.012)	-0.036*** (0.004)	-0.008 (0.005)	-0.190*** (0.057)	-0.005 (0.007)	-0.005 (0.004)	0.008 (0.007)	0.185*** (0.040)
Channelization:Agriculture	-0.010** (0.004)	0.002 (0.002)	-0.001 (0.019)	0.001 (0.002)	0.007** (0.003)	0.003 (0.002)	-0.144*** (0.015)	-0.001 (0.003)	0.006 (0.004)	-0.081 (0.049)	0.007 (0.006)	-0.007* (0.003)	0.020*** (0.006)	0.163*** (0.045)
Channelization:Urban	0.011** (0.004)	0.010*** (0.002)	0.065*** (0.018)	0.004* (0.002)	-0.0005 (0.003)	0.002 (0.002)	-0.013 (0.014)	0.009 (0.005)	0.008 (0.004)	0.001 (0.064)	-0.015* (0.006)	-0.005 (0.004)	-0.008 (0.007)	0.009 (0.047)
Constant	2.341*** (0.137)	0.291*** (0.025)	3.397*** (0.181)	0.862*** (0.010)	0.367*** (0.043)	0.489*** (0.016)	-3.877*** (0.659)	2.930*** (0.110)	0.226*** (0.042)	4.861*** (0.255)	0.743*** (0.032)	0.300*** (0.022)	0.503*** (0.012)	-3.144*** (0.486)
Observations	12314	9521	12314	9521	12314	9521	12314	5475	3596	5335	3596	5335	3596	4853
Log Likelihood	-34296.4	6384.16	-22526.1	6723.06	1663.94	4787.5	-19644.9	-25112.8	2741.45	-13083.6	1337.39	1473.51	1203.42	-9092.68
Akaike Inf. Crit.	68634.9	-12726.3	45094.1	-13404.1	-3285.88	-9533	39331.7	50269.5	-5436.9	26213.2	-2628.77	-2901.02	-2360.83	18231.4
Bayesian Inf. Crit.	68790.7	-12575.9	45249.9	-13253.7	-3130.09	-9382.61	39487.5	50414.9	-5294.58	26364.6	-2486.46	-2749.63	-2218.52	18380.6
Conditional R2	0.697	0.34	0.144	0.093	0.298	0.1	0.746	0.832	0.564	0.138	0.226	0.232	0.053	0.507

## Sheet: VIF
Fish				Macroinvertebrates
Taxonomic Richness	GVIF	Df	GVIF^(1/(2*Df))	Taxonomic Richness	GVIF	Df	GVIF^(1/(2*Df))
Ships	1.5183	1	1.23219	Ships	2.56158	1	1.60049
Ports	1.34757	1	1.16085	Ports	1.4357	1	1.19821
Locks	1.35132	1	1.16246	Locks	1.1883	1	1.09009
Channelization	1.88578	1	1.37324	Channelization	1.56824	1	1.2523
Riparian_Degradation	1.88405	1	1.37261	Riparian_Degradation	1.49396	1	1.22228
Agriculture	1.61974	1	1.27269	Agriculture	1.91541	1	1.38398
Urban	1.63807	1	1.27987	Urban	1.46508	1	1.21041
Catchment6_size	1.21237	1	1.10108	Catchment6_size	1.21513	1	1.10233
Strahler	1.51704	3	1.07193	Strahler	1.46805	3	1.06608
Ships:Rip_Deg	1.88133	1	1.37162	Year	1.00153	2	1.00038
Ships:Agriculture	1.36723	1	1.16929	Ships:Rip_Deg	1.85847	1	1.36326
Ships:Urban	1.47948	1	1.21634	Ships:Agriculture	1.87597	1	1.36966
Channelization:Rip_Deg	1.37464	1	1.17245	Ships:Urban	2.2372	1	1.49573
Channelization:Agriculture	1.18261	1	1.08748	Channelization:Rip_Deg	1.32425	1	1.15076
Channelization:Urban	1.74679	1	1.32166	Channelization:Agriculture	1.27284	1	1.1282
				Channelization:Urban	1.4336	1	1.19733
Functional Richness	GVIF	Df	GVIF^(1/(2*Df))	Functional Richness	GVIF	Df	GVIF^(1/(2*Df))
Ships	1.52251	1	1.2339	Ships	3.345	1	1.82893
Ports	1.32728	1	1.15208	Ports	1.48807	1	1.21986
Locks	1.34807	1	1.16106	Locks	1.17225	1	1.08271
Channelization	1.79949	1	1.34145	Channelization	1.53187	1	1.23769
Riparian_Degradation	1.52241	1	1.23386	Riparian_Degradation	1.77971	1	1.33406
Agriculture	1.55946	1	1.24878	Agriculture	1.36081	1	1.16654
Urban	1.5236	1	1.23434	Urban	1.62651	1	1.27535
Catchment6_size	1.29321	1	1.13719	Catchment6_size	1.31031	1	1.14469
Strahler	1.55461	3	1.07631	Strahler	1.82146	3	1.1051
Ships:Rip_Deg	1.53694	1	1.23974	Year	1.00937	2	1.00233
Ships:Agriculture	1.30441	1	1.14211	Ships:Rip_Deg	2.07386	1	1.44009
Ships:Urban	1.37918	1	1.17438	Ships:Agriculture	1.43426	1	1.19761
Channelization:Rip_Deg	1.37329	1	1.17188	Ships:Urban	2.90775	1	1.70521
Channelization:Agriculture	1.20856	1	1.09935	Channelization:Rip_Deg	2.17001	1	1.4731
Channelization:Urban	1.7213	1	1.31198	Channelization:Agriculture	1.86732	1	1.3665
				Channelization:Urban	1.74378	1	1.32052
Taxonomic Diversity	GVIF	Df	GVIF^(1/(2*Df))	Taxonomic Diversity	GVIF	Df	GVIF^(1/(2*Df))
Ships	1.35748	1	1.16511	Ships	2.7979	1	1.67269
Ports	1.41073	1	1.18774	Ports	1.48011	1	1.2166
Locks	1.34695	1	1.16058	Locks	1.21342	1	1.10155
Channelization	1.68517	1	1.29814	Channelization	1.41064	1	1.18771
Riparian_Degradation	1.33472	1	1.1553	Riparian_Degradation	1.18882	1	1.09033
Agriculture	1.54695	1	1.24376	Agriculture	1.23639	1	1.11193
Urban	1.54327	1	1.24228	Urban	1.62523	1	1.27485
Catchment6_size	1.35923	1	1.16586	Catchment6_size	1.29305	1	1.13712
Strahler	1.6236	3	1.08413	Strahler	1.56834	3	1.07789
Ships:Rip_Deg	1.33367	1	1.15484	Year	1.01401	2	1.00348
Ships:Agriculture	1.28273	1	1.13258	Ships:Rip_Deg	1.84542	1	1.35846
Ships:Urban	1.33681	1	1.1562	Ships:Agriculture	1.27694	1	1.13002
Channelization:Rip_Deg	1.36428	1	1.16803	Ships:Urban	2.49003	1	1.57798
Channelization:Agriculture	1.21351	1	1.10159	Channelization:Rip_Deg	1.34004	1	1.1576
Channelization:Urban	1.65738	1	1.28739	Channelization:Agriculture	1.29317	1	1.13718
				Channelization:Urban	1.33971	1	1.15746
Functional Diversity	GVIF	Df	GVIF^(1/(2*Df))	Functional Diversity	GVIF	Df	GVIF^(1/(2*Df))
Ships	1.49931	1	1.22446	Ships	3.35495	1	1.83165
Ports	1.3229	1	1.15017	Ports	1.49793	1	1.2239
Locks	1.34847	1	1.16124	Locks	1.17403	1	1.08353
Channelization	1.79212	1	1.3387	Channelization	1.53744	1	1.23994
Riparian_Degradation	1.52729	1	1.23584	Riparian_Degradation	1.79022	1	1.33799
Agriculture	1.53599	1	1.23935	Agriculture	1.36295	1	1.16746
Urban	1.50594	1	1.22717	Urban	1.62991	1	1.27668
Catchment6_size	1.29309	1	1.13714	Catchment6_size	1.31978	1	1.14882
Strahler	1.55091	3	1.07588	Strahler	1.8578	3	1.10875
Ships:Rip_Deg	1.54125	1	1.24147	Year	1.02929	2	1.00724
Ships:Agriculture	1.30882	1	1.14403	Ships:Rip_Deg	2.08487	1	1.44391
Ships:Urban	1.37542	1	1.17278	Ships:Agriculture	1.4347	1	1.19779
Channelization:Rip_Deg	1.37455	1	1.17241	Ships:Urban	2.91744	1	1.70805
Channelization:Agriculture	1.21107	1	1.10049	Channelization:Rip_Deg	2.17552	1	1.47497
Channelization:Urban	1.716	1	1.30996	Channelization:Agriculture	1.87259	1	1.36843
				Channelization:Urban	1.75016	1	1.32294
Taxonomic Evenness	GVIF	Df	GVIF^(1/(2*Df))	Taxonomic Evenness	GVIF	Df	GVIF^(1/(2*Df))
Ships	1.36205	1	1.16707	Ships	2.79819	1	1.67278
Ports	1.41081	1	1.18777	Ports	1.47386	1	1.21403
Locks	1.3467	1	1.16048	Locks	1.21288	1	1.10131
Channelization	1.68554	1	1.29828	Channelization	1.41005	1	1.18746
Riparian_Degradation	1.33325	1	1.15466	Riparian_Degradation	1.18493	1	1.08854
Agriculture	1.55366	1	1.24646	Agriculture	1.23513	1	1.11136
Urban	1.54609	1	1.24342	Urban	1.62141	1	1.27335
Catchment6_size	1.36035	1	1.16634	Catchment6_size	1.291	1	1.13622
Strahler	1.6261	3	1.0844	Strahler	1.55942	3	1.07686
Ships:Rip_Deg	1.3335	1	1.15477	Year	1.00859	2	1.00214
Ships:Agriculture	1.28598	1	1.13401	Ships:Rip_Deg	1.84238	1	1.35734
Ships:Urban	1.33739	1	1.15645	Ships:Agriculture	1.27512	1	1.12921
Channelization:Rip_Deg	1.36415	1	1.16797	Ships:Urban	2.49593	1	1.57985
Channelization:Agriculture	1.2147	1	1.10213	Channelization:Rip_Deg	1.33845	1	1.15691
Channelization:Urban	1.6577	1	1.28752	Channelization:Agriculture	1.29282	1	1.13702
				Channelization:Urban	1.33719	1	1.15637
Functional Evenness	GVIF	Df	GVIF^(1/(2*Df))	Functional Evenness	GVIF	Df	GVIF^(1/(2*Df))
Ships	1.50993	1	1.22879	Ships	3.36432	1	1.83421
Ports	1.31997	1	1.1489	Ports	1.51624	1	1.23136
Locks	1.34868	1	1.16132	Locks	1.1791	1	1.08586
Channelization	1.79219	1	1.33873	Channelization	1.54952	1	1.2448
Riparian_Degradation	1.52273	1	1.23399	Riparian_Degradation	1.81833	1	1.34846
Agriculture	1.55124	1	1.24549	Agriculture	1.37467	1	1.17246
Urban	1.50644	1	1.22737	Urban	1.64319	1	1.28187
Catchment6_size	1.29825	1	1.13941	Catchment6_size	1.3171	1	1.14765
Strahler	1.56269	3	1.07724	Strahler	1.9203	3	1.11488
Ships:Rip_Deg	1.53979	1	1.24088	Year	1.04568	2	1.01123
Ships:Agriculture	1.32023	1	1.14901	Ships:Rip_Deg	2.09585	1	1.44771
Ships:Urban	1.37458	1	1.17243	Ships:Agriculture	1.44138	1	1.20057
Channelization:Rip_Deg	1.37535	1	1.17275	Ships:Urban	2.89956	1	1.70281
Channelization:Agriculture	1.21496	1	1.10225	Channelization:Rip_Deg	2.19881	1	1.48284
Channelization:Urban	1.71636	1	1.3101	Channelization:Agriculture	1.89017	1	1.37484
				Channelization:Urban	1.75254	1	1.32384
Invasive Abundance	GVIF	Df	GVIF^(1/(2*Df))	Invasive Abundance	GVIF	Df	GVIF^(1/(2*Df))
Ships	1.36542	1	1.16851	Ships	2.92314	1	1.70972
Ports	1.4166	1	1.19021	Ports	1.48627	1	1.21913
Locks	1.34793	1	1.16101	Locks	1.17946	1	1.08603
Channelization	1.69176	1	1.30068	Channelization	1.64046	1	1.28081
Riparian_Degradation	1.33206	1	1.15415	Riparian_Degradation	1.23247	1	1.11017
Agriculture	1.5502	1	1.24507	Agriculture	1.23705	1	1.11223
Urban	1.5554	1	1.24716	Urban	1.7066	1	1.30637
Catchment6_size	1.35879	1	1.16567	Catchment6_size	1.29903	1	1.13975
Strahler	1.62686	3	1.08449	Strahler	1.72605	3	1.09524
Ships:Rip_Deg	1.32655	1	1.15176	Year	1.02178	2	1.0054
Ships:Agriculture	1.26279	1	1.12374	Ships:Rip_Deg	1.86871	1	1.36701
Ships:Urban	1.33543	1	1.15561	Ships:Agriculture	1.24872	1	1.11746
Channelization:Rip_Deg	1.36153	1	1.16685	Ships:Urban	2.7771	1	1.66646
Channelization:Agriculture	1.20579	1	1.09808	Channelization:Rip_Deg	1.4838	1	1.21811
Channelization:Urban	1.661	1	1.2888	Channelization:Agriculture	1.81089	1	1.34569
				Channelization:Urban	1.49909	1	1.22437
