# Supplementary material for: Inland navigation is a driver of freshwater biodiversity declines in Europe
Source: Research Square preprint supplement (doi:10.21203/rs.3.rs-3316255/v1), 2023-09-14
Supplement: Supplementary file 3 [file 74d9f6cccdab18e23b58eb0a.xlsx]

## Sheet: Tab1
Fish
Trait	Trt_Axis1_full	Trt_Axis2_full	Trt_Axis1_a25	Trt_Axis2_a25	Trt_Axis1_a75	Trt_Axis2_a75	Trt_Axis1_u25	Trt_Axis2_u25	Trt_Axis1_u75	Trt_Axis2_u75	Trt_Axis1_r25	Trt_Axis2_r25	Trt_Axis1_r75	Trt_Axis2_r75
Feedi.detritivorous	0.418585	-0.572942	0.859434	-0.0957168	0.446825	-0.896065	0.451258	-0.214968	0.910571	-0.227475	0.439498	-0.850095	-0.400484	-1.102
Feedi.invertivorous	0.408785	-0.277715	0.422923	0.00756436	0.322102	-0.58026	0.411626	0.267702	0.307143	-0.178545	0.277535	-0.514577	-0.382457	0.159181
Feedi.omnivorous	-0.0228517	0.249534	-0.0635686	0.0839996	0.154469	0.26316	-0.139308	-0.221004	0.203611	0.194075	0.177209	0.19371	0.149657	-0.159483
Feedi.parasitic	-0.445497	0.873749	-0.242749	-0.517305	0.29668	-0.107457	-0.0266478	-2.55366	-0.124022	1.12119	-0.617774	1.03877	1.86393	-3.64219
Feedi.phytovorous	0.493451	-0.245773	-1.11925	0.760553	0.558371	-1.00584	-0.45601	-1.1196	0.907048	-0.287289	0.410287	-1.11837	-0.528066	-1.29274
Feedi.piscivorous	-0.527801	0.284584	-0.502585	-0.49206	-0.0158353	0.618978	-0.595871	0.448347	-0.36695	0.358693	-0.0491365	0.385889	0.901004	0.372884
Feedi.planktivorous	-1.8949	-2.87237	-1.42309	0.292954	-1.29024	-0.499688	-2.10964	2.34646	-0.925317	-0.732017	-1.29541	-0.538718	1.03876	-1.30424
Habit.benthic	0.123047	0.17931	0.0582374	0.248119	0.210119	0.0874085	-0.0219803	-0.407919	0.266011	0.0649717	0.231636	0.0811146	-0.231176	-0.286993
Habit.demersal	-0.0111894	-0.242365	0.083894	-0.759312	0.102658	-0.030933	0.221246	0.692516	-0.0637751	0.286527	0.0291711	-0.114615	0.546691	0.771642
Habit.pelagic	-2.00495	-1.60093	-2.04838	1.68197	-1.26832	-0.445497	-3.06143	3.56798	-0.899608	-0.570553	-1.23853	-0.258241	2.93578	-1.91827
Migra.diadromous	-0.927878	-0.717345	-0.303394	-0.794448	-0.88046	-0.235174	-0.4983	0.21549	-0.705429	-0.421028	-0.80223	-0.204245	1.00956	0.158836
Migra.non.migratory	0.408888	-0.396387	0.56247	-0.566241	0.343984	-0.597651	0.440776	0.0119458	0.417462	-0.489817	0.210702	-0.801459	-0.0421119	1.11275
Migra.potamodromous	0.0674497	0.166602	-0.0271948	0.20856	0.17432	0.136099	-0.0309538	-0.0234232	0.206532	0.190908	0.196997	0.162224	-0.0731583	-0.188365
Repro.lithopelagophil	0.70628	0.145673	0.586783	2.44337	0.478552	-0.885695	0.173941	-3.15034	0.327639	-1.91026	0.564787	-1.27419	-1.86327	-3.96213
Repro.lithophil	0.131323	-0.810975	0.563774	-0.0496247	-0.430653	-0.627244	0.525228	0.568836	-0.487996	-0.721578	-0.602122	-0.676084	-0.305988	0.139767
Repro.ostracophil	0.657453	-0.131742	0.839127	1.58309	0.482997	-0.795866	0.322428	-0.817455	1.13495	-1.69491	0.424215	-1.10548	-0.836167	0.203063
Repro.pelagophil	-0.729555	0.648617	-0.84689	0.101473	0.221377	-0.302121	-1.23604	1.07775	-0.012519	0.353349	-0.100809	0.816198	1.28852	-0.664835
Repro.phytolithophil	-0.221538	0.418474	-0.23113	-0.0127952	0.0598015	0.56068	-0.362355	-0.116327	0.0727091	0.361735	0.132235	0.432223	0.2742	-0.305838
Repro.phytophil	0.209006	-0.118692	0.275666	-0.0393762	0.270355	-0.430266	0.169596	-0.187496	0.15074	0.283887	0.0646265	-0.56062	0.399398	0.0166833
Repro.polyphil	0.585717	-0.206155	0.878777	1.22199	0.395345	-0.622259	0.36925	-0.950136	0.790252	-1.03649	0.457889	-0.920296	-0.790487	-0.0567424
Repro.psammophil	-1.66361	-3.03048	-0.174851	-5.15782	-2.02675	0.499764	0.0612244	-1.89204	-0.442892	0.524387	-1.198	0.247847	0.0231337	-1.35543
Repro.speleophil	0.0685553	-0.643055	0.424373	-1.52037	-0.563007	0.728126	0.509201	0.749551	-0.234794	0.744408	-0.0550695	-0.261688	0.590217	1.86362
Rheop.eurytop	-0.292185	0.180386	-0.229216	-0.131647	-0.173943	0.29077	-0.302182	-0.0763075	-0.138017	0.158458	-0.114915	0.245945	0.368279	-0.159704
Rheop.limnophil	0.588133	-0.269054	0.780442	0.906101	0.45882	-0.774009	0.335617	-0.294786	1.00838	-1.50874	0.296326	-1.08348	-0.68143	0.0479286
Rheop.rheophil	0.500959	-0.332824	0.596721	0.245497	0.387142	-0.644459	0.483153	0.199136	0.56262	-0.536763	0.423461	-0.731802	-0.424736	0.222748
Sensitivity	-0.262955	0.18885	-0.422978	-0.00144388	-0.144282	0.116578	-0.322336	0.266092	-0.18575	0.386368	-0.137676	0.298895	0.33669	0.105106
FRI	-0.430372	0.24383	-0.444595	-0.033303	-0.372293	0.317704	-0.457962	-0.291706	-0.433025	0.274201	-0.354336	0.36276	0.359897	-0.307947
S2FRI	0.0704964	-0.0111341	0.179478	-0.332914	0.131945	0.287026	0.142324	0.0387848	0.156383	0.0429841	0.25792	0.0943034	0.0101536	0.370254
Predictor	Env_Axis1_Full	Env_Axis2_Full	Env_Axis1_a25	Env_Axis2_a25	Env_Axis1_a75	Env_Axis2_a75	Env_Axis1_u25	Env_Axis2_u25	Env_Axis1_u75	Env_Axis2_u75	Env_Axis1_r25	Env_Axis2_r25	Env_Axis1_r75	Env_Axis2_r75
Channelization	-0.195777	-0.212115	-0.354292	-0.0886213	-0.362564	0.296772	0.0456333	0.804488	-0.408865	-0.0205739	-0.264386	0.0912201	0.442775	0.658028
Ships	-0.670307	0.725125	-0.884899	0.25907	-0.301004	0.714083	-0.834465	0.262875	-0.294053	0.906561	-0.160219	0.975051	0.740109	-0.199566
Ports	-0.683787	-0.654947	-0.237548	-0.950185	-0.877248	-0.309952	-0.310718	0.154856	-0.755748	-0.117335	-0.845212	-0.136132	0.49889	-0.166961
Locks	0.211648	-0.0156669	0.187087	-0.148921	0.0915446	0.55312	0.452815	0.509623	0.418578	0.404916	0.435943	0.149741	-0.0854261	0.706609
Macroinvertebrates
Trait	Trt_Axis1_full	Trt_Axis2_full	Trt_Axis1_a25	Trt_Axis2_a25	Trt_Axis1_a75	Trt_Axis2_a75	Trt_Axis1_u25	Trt_Axis2_u25	Trt_Axis1_u75	Trt_Axis2_u75	Trt_Axis1_r25	Trt_Axis2_r25	Trt_Axis1_r75	Trt_Axis2_r75
Saprobity_xenosaprobic	0.0823661	0.0588427	-0.0949012	-0.087396	-0.154021	0.00777339	0.118645	0.023522	-0.0158562	-0.144402	0.123238	0.225788	-0.00447753	0.0141553
Saprobity_oligosaprobic	0.0953898	-0.0472648	-0.0112549	-0.0466908	-0.140481	0.177645	0.209884	-0.101863	-0.00120006	-0.159153	0.12807	0.122233	-0.109407	0.0979489
Saprobity_beta.mesosaprobic	-0.179604	0.301865	-0.189429	-0.301128	0.13651	-0.0866689	-0.0692757	-0.227548	0.0961879	-0.201102	-0.0641956	0.197815	-0.108098	-0.2717
Saprobity_alpha.mesosaprobic	-0.0412187	0.0255396	0.100532	0.0358233	0.0773861	-0.311155	-0.273704	0.167977	-0.0867761	0.183856	-0.0640751	-0.120479	0.140092	-0.028934
Saprobity_polysaprobic	-0.112652	-0.135018	-0.229257	0.210966	-0.0251921	-0.0443086	-0.323091	-0.0366677	0.299169	0.226547	-0.127923	0.138267	0.116547	-0.179153
Substrate_flags_boulders_cobbles_pebbles	-0.184611	-0.333422	-0.096708	0.232446	0.179707	0.329761	0.113704	-0.279373	0.138567	0.260524	-0.171917	0.0363426	0.148034	-0.0809871
Substrate_gravel	-0.211203	0.243519	-0.229299	-0.233619	0.125898	-0.00315484	-0.0680299	-0.290334	0.167035	-0.294925	-0.106981	0.328235	-0.138106	-0.280329
Substrate_sand	-0.124856	0.188222	-0.210686	-0.161292	-0.00743779	0.113717	-0.0280717	-0.274493	0.245664	-0.192567	-0.067546	0.430836	-0.168458	-0.224329
Substrate_silt	0.0117192	0.212724	-0.101575	-0.244003	-0.0946557	0.0810452	0.0815766	-0.116377	0.106346	-0.290636	0.0979572	0.254672	-0.265783	-0.0865387
Substrate_macrophytes	-0.0637642	-0.0301785	0.0588611	0.113824	0.0812626	-0.266238	-0.211578	0.174763	-0.148336	0.160007	-0.117735	-0.191139	0.203323	-0.0483126
Substrate_microphytes	-0.26974	0.0685843	-0.193408	0.0343035	0.229619	-0.329964	-0.361893	0.051119	0.100007	0.142089	-0.265221	-0.135085	0.0371455	-0.243445
Substrate_twigs_roots	-0.18578	-0.191739	-0.159092	0.20681	0.125424	-0.045593	-0.163094	0.0758226	0.151644	0.185539	-0.240405	0.00820244	0.157236	-0.0768125
Substrate_organic_detritus_litter	0.088441	-0.11653	0.172163	0.135841	-0.104601	-0.106344	-0.181707	0.00919987	-0.0674124	0.0863542	0.0568464	0.030439	0.0667718	0.108829
Substrate_mud	0.181015	0.208176	0.0794988	-0.27474	-0.262845	-0.0713516	0.0209498	0.0112371	0.0334648	-0.0782381	0.200456	0.157997	-0.243692	0.011929
Dispersal_aquatic_passive	-0.301539	-0.0795333	-0.104674	0.0654822	0.376009	0.104548	-0.161483	-0.270309	0.100167	0.0696415	-0.323275	-0.107387	-0.0132586	-0.174386
Dispersal_aquatic_active	0.134062	-0.214529	0.258006	-0.0148633	-0.0853585	0.193837	0.239403	-0.0362531	-0.233933	0.259608	0.21443	-0.161251	0.196561	0.0474895
Dispersal_aerial_passive	5.88351e-05	-0.238781	-0.0790279	0.26536	-0.0119814	0.167019	0.0883213	-0.107802	0.161959	0.232299	-0.031282	0.176939	0.130038	0.0868977
Dispersal_aerial_active	0.298448	0.208016	0.0197529	-0.207879	-0.411207	-0.135371	0.10055	0.300209	0.0344742	-0.288037	0.288507	0.272206	-0.276367	0.274972
Loco_flier	0.337281	0.0552959	0.313558	-0.0714301	-0.362509	-0.181732	0.0647048	0.319306	-0.310978	-0.0933811	0.338858	-0.0393984	0.0693056	0.260832
Loco_surface_swimmer	0.00664076	-0.29515	0.0365538	0.330147	0.0396958	0.22197	0.0486621	-0.135259	0.110564	0.227007	-0.0391256	0.0194191	0.12394	0.16931
Loco_full_water_swimmer	0.291748	-0.0267899	0.336412	-0.000285513	-0.261158	0.0169198	0.141136	0.200612	-0.33168	-0.023777	0.309487	-0.120595	0.108309	0.283795
Loco_crawler	-0.0780836	0.0336891	-0.224135	-0.0184154	-0.0588256	-0.257779	-0.14387	0.0890432	0.00522834	-0.0768996	-0.0769846	0.216781	0.0203087	-0.0831895
Loco_burrower	0.0667276	0.179287	-0.00524234	-0.285469	-0.0719652	0.100257	0.0867134	-0.0146428	0.220523	-0.074374	-0.000826181	0.0148429	-0.434994	-0.00952512
Loco_interstitial	-0.29522	0.0496179	-0.233262	0.0935105	0.244073	-0.154297	-0.341772	-0.0545182	0.122737	0.0108077	-0.278609	-0.034581	0.0975677	-0.269678
Loco_temporarily_attached	-0.126885	-0.0411617	-0.114441	0.161361	0.121247	0.198575	0.0966473	-0.309255	0.0443702	-0.0512226	-0.0743979	0.171374	0.144796	-0.197856
Loco_permanently_attached	0.0257217	-0.0174707	-0.0112651	-0.00237112	-0.0846446	0.0184842	0.0459417	0.213516	-0.0112844	0.052132	0.00183597	-0.162074	-0.0523169	0.139712
Reproduction_ovoviviparity	-0.290119	0.0571376	-0.231429	0.0871853	0.243725	-0.131511	-0.326165	-0.0587531	0.134928	0.00527581	-0.275865	-0.0428905	0.0633263	-0.283528
Reproduction_eggs.free	-0.0058493	0.287376	-0.103265	-0.223067	0.0688269	-0.00281225	-0.0180247	-0.0973513	0.199817	-0.169851	-0.0115079	0.207514	-0.488524	0.0585185
Reproduction_eggs.cemented	0.0422184	-0.0501917	0.189103	-0.0814343	0.0233903	0.236311	0.108822	0.032228	-0.224304	0.0848438	0.108855	-0.233232	0.0738005	0.0712022
Reproduction_clutches.fixed	0.255269	-0.142236	0.310112	0.048523	-0.15847	0.143359	0.280507	0.114951	-0.340049	0.0942249	0.257468	-0.137143	0.143984	0.226557
Reproduction_clutches.free	0.0393537	-0.284188	0.0433082	0.280394	-0.0565706	0.0659114	0.0281309	-0.0689465	0.15027	0.234831	-0.017502	0.0660807	0.0717391	0.169038
Reproduction_clutches.vegetation	0.140707	0.1363	0.241484	-0.0469201	-0.0567329	-0.302941	0.0196722	0.245226	-0.190571	-0.210808	0.110684	-0.112257	0.0225771	0.162891
Reproduction_clutches.terrestrial	0.0640187	-0.210879	-0.0177214	0.112585	-0.113838	0.164778	0.115049	-0.163263	0.23156	0.162798	-0.00856459	0.146754	-0.0855361	0.169466
Reproduction_asexual	-0.056374	-0.013357	-0.0446917	0.00372085	0.026219	-0.035252	0.0328873	-0.0984345	0.0223702	-0.0106223	-0.0177993	0.0311647	0.0561801	-0.0741914
Predictor	Env_Axis1_Full	Env_Axis2_Full	Env_Axis1_a25	Env_Axis2_a25	Env_Axis1_a75	Env_Axis2_a75	Env_Axis1_u25	Env_Axis2_u25	Env_Axis1_u75	Env_Axis2_u75	Env_Axis1_r25	Env_Axis2_r25	Env_Axis1_r75	Env_Axis2_r75
Ships	0.720018	-0.620719	0.72701	0.673542	-0.706431	0.123102	0.280065	0.778178	-0.539974	0.588753	0.554874	0.0403461	0.134775	0.98561
Channelization	0.14346	0.265943	0.232367	-0.198287	-0.287016	0.738672	0.308735	-0.427855	-0.173016	0.181876	0.292861	0.558869	0.118311	0.0445413
Ports	0.662996	0.496043	0.481415	-0.637492	-0.398825	0.0891787	0.158719	0.426551	-0.746245	-0.103317	0.617408	-0.672718	-0.887062	0.16245
Locks	0.146388	0.545825	-0.43093	0.317217	-0.509427	-0.656701	-0.895017	0.171559	-0.348728	-0.780779	0.474504	0.483207	-0.425392	-0.0140982
