# Supplementary material for: Inland navigation is a driver of freshwater biodiversity declines in Europe
Source: Research Square preprint supplement (doi:10.21203/rs.3.rs-3316255/v1), 2023-09-14
Supplement: Supplementary file 4 [file d313518ca22de86e3f850814.docx]

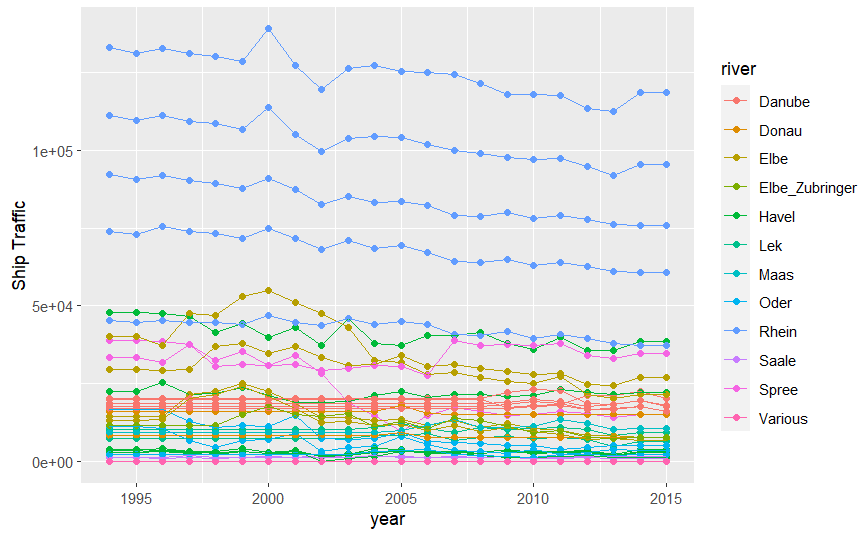


Supplemental Figure 1 – Vessels per year passing through specific locks, from 1992 to 2015. Locks are color-coded by the river they are within.
