# Supplementary material for: Inland navigation is a driver of freshwater biodiversity declines in Europe
Source: Research Square preprint supplement (doi:10.21203/rs.3.rs-3316255/v1), 2023-09-14
Supplement: Supplementary file 5 [file fcbfeb6c5642d50d0d83075e.xlsx]

## Sheet: Feuil1
Fish			Macroinvertebrates
Importance of components	PC1	PC2	Importance of components	PC1	PC2
Standard deviation	20.6254	16.279	Standard deviation	22.2563	14.1354
Proportion of Variance	0.6162	0.3838	Proportion of Variance	0.7126	0.2874
Cumulative Proportion	0.6162	1	Cumulative Proportion	0.7126	1
Rotation Scores	PC1	PC2	Rotation Scores	PC1	PC2
Urban	0.521456	-0.853278	Urban	0.955202	-0.295953
Agriculture	-0.853278	-0.521456	Agriculture	-0.295953	-0.955202
